# Supplementary material
Source: publisher site journal article supplement (https://www.dovepress.com/article/317207)

Supplemental file

Supplemental Figure 1. PSD-induced depressive-like behaviors in rats treated with Vehicle. (A) Body weight in each group. (B-C) The horizontal and vertical motion scores of open field test (OFT) in each group. (D) Sucrose preference test (SPT) consumption in each group.


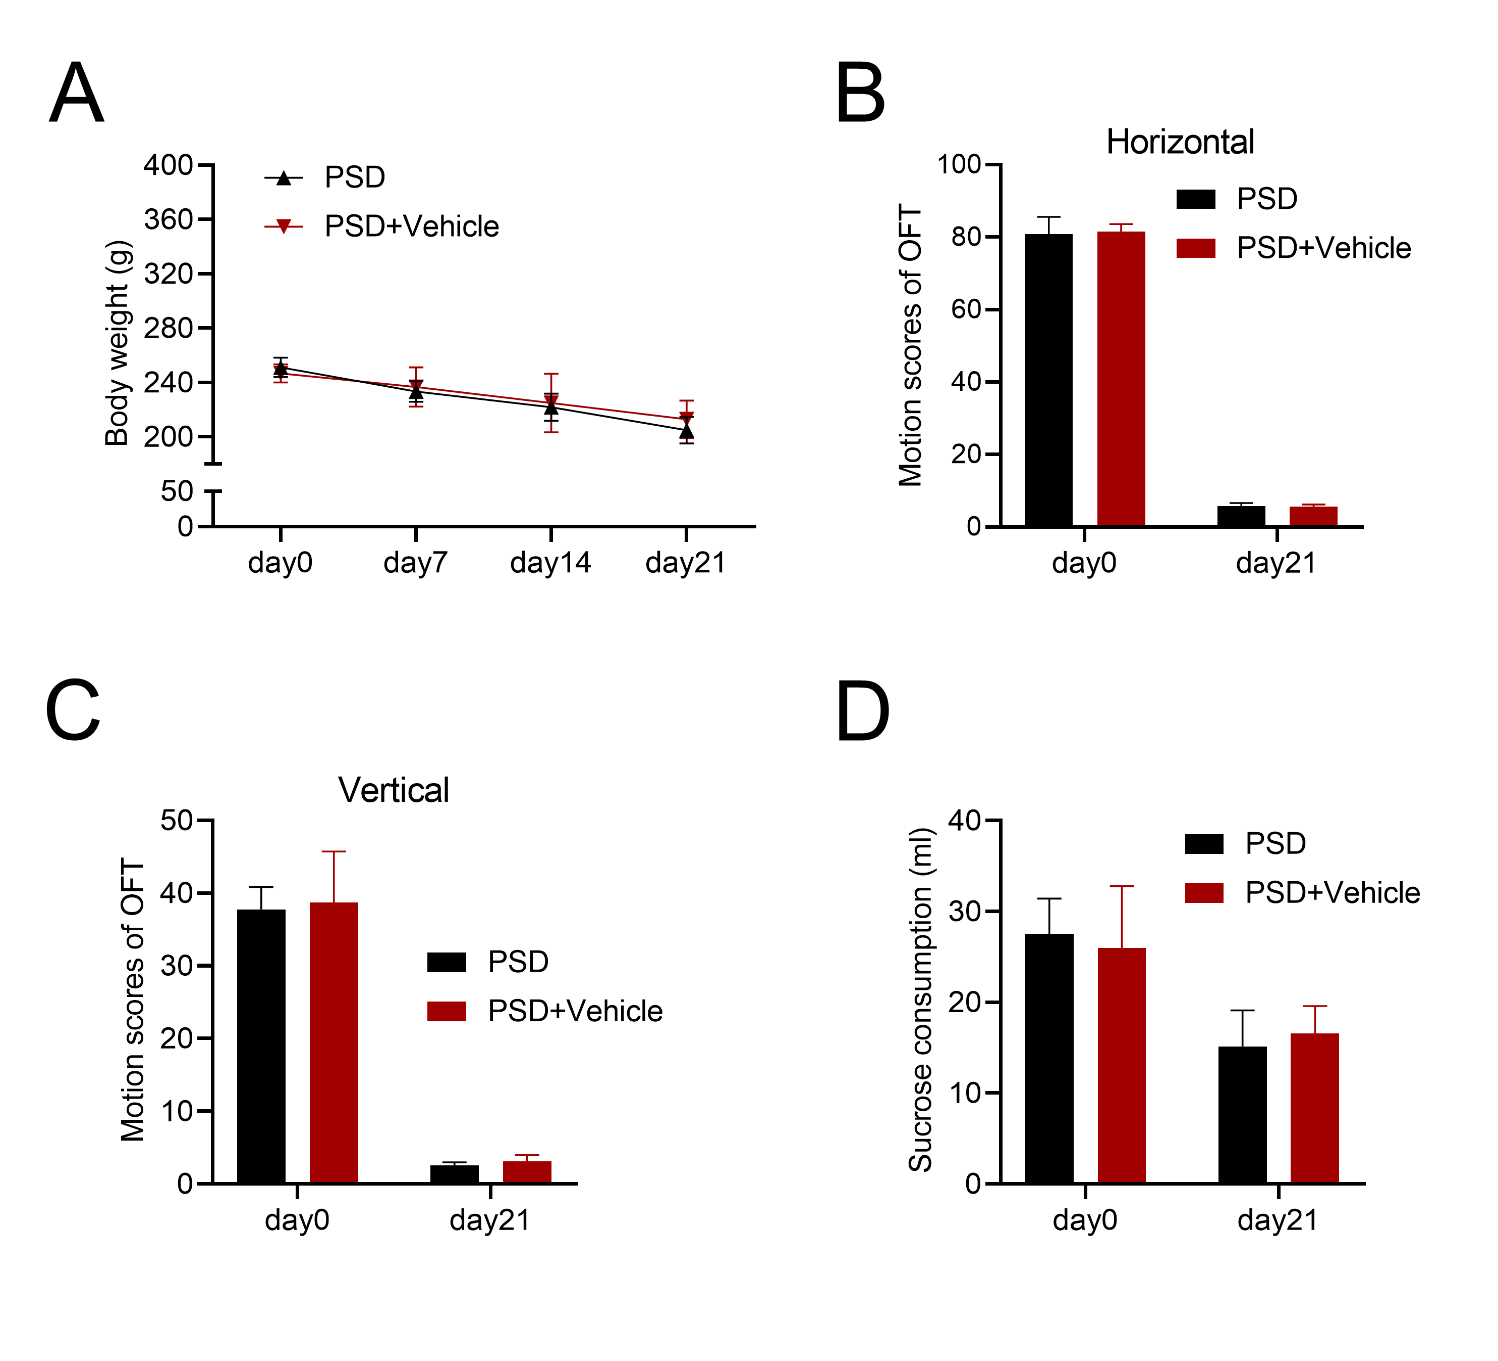

Supplement: Supplementary file 1 [file get_supplementary_file.php]
